# Supplementary material
Source: MDPI journal article supplement (https://www.mdpi.com/2312-7481/9/6/159)
Supplement: s1 [file s1]

## Supplementary materials

# The organic ammonium counterion effect on slow magnetic relaxation of the [Er(hfac)<sub>4</sub>]<sup>-</sup> complexes

Tatiana G. Prokhorova, Denis V. Korchagin \*, Gennady V. Shilov, Aleksei I. Dmitriev, Mikhail V. Zhidkov and Eduard B. Yagubskii \*

Federal Research Center of Problems of Chemical Physics and Medicinal Chemistry, Russian Academy of Sciences, 142432 Chernogolovka, Russian Federation

\* Correspondence: authors E-mail addresses: korden@icp.ac.ru (D.V.K.); yagubskii@gmail.com (E.B.Y.)

**Table S1.** Selected bond lengths [Å] and angles [deg] for **5**.

|                 |            |                   |            |                   |            |
|-----------------|------------|-------------------|------------|-------------------|------------|
| Er(1)-O(1)      | 2.308(3)   | Er(2)-O(9)        | 2.299(3)   | Er(3)-O(17)       | 2.306(3)   |
| Er(1)-O(4)      | 2.311(3)   | Er(2)-O(12)       | 2.316(3)   | Er(3)-O(19)       | 2.309(3)   |
| Er(1)-O(8)      | 2.312(3)   | Er(2)-O(14)       | 2.316(3)   | Er(3)-O(23)       | 2.318(3)   |
| Er(1)-O(6)      | 2.322(3)   | Er(2)-O(10)       | 2.319(3)   | Er(3)-O(21)       | 2.322(3)   |
| Er(1)-O(5)      | 2.325(3)   | Er(2)-O(11)       | 2.320(3)   | Er(3)-O(20)       | 2.322(3)   |
| Er(1)-O(2)      | 2.327(3)   | Er(2)-O(16)       | 2.322(3)   | Er(3)-O(18)       | 2.327(3)   |
| Er(1)-O(7)      | 2.328(3)   | Er(2)-O(13)       | 2.331(3)   | Er(3)-O(22)       | 2.329(3)   |
| Er(1)-O(3)      | 2.330(3)   | Er(2)-O(15)       | 2.334(3)   | Er(3)-O(24)       | 2.339(3)   |
| O(1)-Er(1)-O(4) | 80.12(10)  | O(9)-Er(2)-O(12)  | 112.62(9)  | O(17)-Er(3)-O(19) | 113.58(10) |
| O(1)-Er(1)-O(8) | 73.79(10)  | O(9)-Er(2)-O(14)  | 72.88(11)  | O(17)-Er(3)-O(23) | 137.93(10) |
| O(4)-Er(1)-O(8) | 148.41(10) | O(12)-Er(2)-O(14) | 74.66(10)  | O(19)-Er(3)-O(23) | 81.56(10)  |
| O(1)-Er(1)-O(6) | 113.28(9)  | O(9)-Er(2)-O(10)  | 75.22(10)  | O(17)-Er(3)-O(21) | 75.21(10)  |
| O(4)-Er(1)-O(6) | 137.49(10) | O(12)-Er(2)-O(10) | 149.66(10) | O(19)-Er(3)-O(21) | 73.14(10)  |
| O(8)-Er(1)-O(6) | 70.92(10)  | O(14)-Er(2)-O(10) | 80.43(10)  | O(23)-Er(3)-O(21) | 145.37(10) |
| O(1)-Er(1)-O(5) | 149.01(10) | O(9)-Er(2)-O(11)  | 145.35(11) | O(17)-Er(3)-O(20) | 148.63(10) |
| O(4)-Er(1)-O(5) | 76.02(10)  | O(12)-Er(2)-O(11) | 74.83(9)   | O(19)-Er(3)-O(20) | 75.82(10)  |
| O(8)-Er(1)-O(5) | 134.25(10) | O(14)-Er(2)-O(11) | 139.01(10) | O(23)-Er(3)-O(20) | 71.34(10)  |
| O(6)-Er(1)-O(5) | 74.02(9)   | O(10)-Er(2)-O(11) | 116.26(9)  | O(21)-Er(3)-O(20) | 79.69(10)  |
| O(1)-Er(1)-O(2) | 74.39(9)   | O(9)-Er(2)-O(16)  | 82.56(10)  | O(17)-Er(3)-O(18) | 75.01(10)  |
| O(4)-Er(1)-O(2) | 72.57(10)  | O(12)-Er(2)-O(16) | 135.36(10) | O(19)-Er(3)-O(18) | 145.59(11) |
| O(8)-Er(1)-O(2) | 83.37(10)  | O(14)-Er(2)-O(16) | 147.87(10) | O(23)-Er(3)-O(18) | 72.51(10)  |
| O(6)-Er(1)-O(2) | 148.75(10) | O(10)-Er(2)-O(16) | 73.39(10)  | O(21)-Er(3)-O(18) | 139.13(10) |
| O(5)-Er(1)-O(2) | 115.88(9)  | O(11)-Er(2)-O(16) | 71.13(10)  | O(20)-Er(3)-O(18) | 115.04(10) |
| O(1)-Er(1)-O(7) | 136.77(10) | O(9)-Er(2)-O(13)  | 139.91(10) | O(17)-Er(3)-O(22) | 78.97(10)  |
| O(4)-Er(1)-O(7) | 115.35(9)  | O(12)-Er(2)-O(13) | 78.97(10)  | O(19)-Er(3)-O(22) | 140.53(10) |
| O(8)-Er(1)-O(7) | 74.99(10)  | O(14)-Er(2)-O(13) | 73.92(10)  | O(23)-Er(3)-O(22) | 114.97(10) |
| O(6)-Er(1)-O(7) | 83.18(10)  | O(10)-Er(2)-O(13) | 77.69(10)  | O(21)-Er(3)-O(22) | 74.70(9)   |
| O(5)-Er(1)-O(7) | 72.50(10)  | O(11)-Er(2)-O(13) | 73.90(10)  | O(20)-Er(3)-O(22) | 76.47(10)  |
| O(2)-Er(1)-O(7) | 72.98(10)  | O(16)-Er(2)-O(13) | 116.97(10) | O(18)-Er(3)-O(22) | 72.64(10)  |
| O(1)-Er(1)-O(3) | 71.93(10)  | O(9)-Er(2)-O(15)  | 70.11(10)  | O(17)-Er(3)-O(24) | 74.07(10)  |
| O(4)-Er(1)-O(3) | 74.61(9)   | O(12)-Er(2)-O(15) | 72.17(10)  | O(19)-Er(3)-O(24) | 71.12(10)  |
| O(8)-Er(1)-O(3) | 112.62(9)  | O(14)-Er(2)-O(15) | 114.07(9)  | O(23)-Er(3)-O(24) | 74.77(10)  |
| O(6)-Er(1)-O(3) | 72.33(10)  | O(10)-Er(2)-O(15) | 135.26(10) | O(21)-Er(3)-O(24) | 116.97(10) |

|                            |                              |                              |
|----------------------------|------------------------------|------------------------------|
| O(5)-Er(1)-O(3) 82.79(10)  | O(11)-Er(2)-O(15) 81.29(10)  | O(20)-Er(3)-O(24) 135.32(10) |
| O(2)-Er(1)-O(3) 136.10(10) | O(16)-Er(2)-O(15) 74.86(10)  | O(18)-Er(3)-O(24) 80.36(10)  |
| O(7)-Er(1)-O(3) 149.19(10) | O(13)-Er(2)-O(15) 145.93(10) | O(22)-Er(3)-O(24) 145.85(10) |

**Table S2.** Shape analysis for different Er(III) ions in 5.

| Structure<br>[ErO <sub>8</sub> ] | OP-8   | HPY-8  | HBPY-8 | CU-8  | SAPR-8 | TDD-8 | JGBF-8 |
|----------------------------------|--------|--------|--------|-------|--------|-------|--------|
| Er1                              | 29.782 | 23.289 | 14.734 | 7.253 | 0.497  | 2.108 | 15.967 |
| Er2                              | 29.098 | 23.587 | 14.857 | 8.051 | 0.361  | 2.197 | 15.244 |
| Er3                              | 28.912 | 23.542 | 15.354 | 8.447 | 0.273  | 2.061 | 15.479 |

**Table S2.** (continuation)

| Structure<br>[ErO <sub>8</sub> ] | JETBPY-8 | JBTP-8 | BTPR-8 | JSD-8 | TT-8  | ETBPY-8 |
|----------------------------------|----------|--------|--------|-------|-------|---------|
| Er1                              | 29.171   | 3.231  | 2.543  | 5.527 | 8.069 | 23.825  |
| Er2                              | 28.182   | 2.966  | 2.322  | 5.391 | 8.893 | 23.351  |
| Er3                              | 28.457   | 2.800  | 2.271  | 5.106 | 9.248 | 23.671  |

**OP-8** Octagon ( $D_{8h}$ ), **HPY-8** Heptagonal pyramid ( $C_{7v}$ ), **HBPY-8** Hexagonal bipyramid ( $D_{6h}$ ), **CU-8** Cube ( $O_h$ ), **SAPR-8** Square antiprism ( $D_{4d}$ ), **TDD-8** Triangular dodecahedron ( $D_{2d}$ ), **JGBF-8** Johnson-Gyrobifastigium (J26) ( $D_{2d}$ ), **JETBPY-8** Johnson-Elongated triangular bipyramid (J14) ( $D_{3h}$ ), **JBTP-8** Johnson- Biaugmented trigonal prism (J50) ( $C_{2v}$ ), **BTPR-8** Biaugmented trigonal prism ( $C_{2v}$ ), **JSD-8** Snub disphenoid (J84) ( $D_{2d}$ ), **TT-8** Triakis tetrahedron ( $T_d$ ), **ETBPY-8** Elongated trigonal bipyramid ( $D_{3h}$ ).

**Table S3.** The shortest intermolecular contacts.

| Atom1 | Atom2 | d, Å  | Atom1 | Atom2 | d, Å  |
|-------|-------|-------|-------|-------|-------|
| F13   | F100  | 2.925 | F22   | C175  | 3.116 |
| F24   | F44   | 2.874 | F12   | C151  | 2.998 |
| C16   | F26   | 3.137 | O1    | C174  | 3.129 |
| F8    | F39   | 2.894 | O8    | C174  | 3.179 |
| F18   | F36   | 2.931 | F146  | F32   | 2.905 |
| C8    | F62   | 3.137 | F35   | F36   | 2.929 |
| F10   | F49   | 2.911 | C31   | F60   | 3.155 |
| F4    | F47   | 2.802 | F26   | F55   | 2.677 |
| F2    | F70   | 2.868 | F38   | F63   | 2.905 |
| F2    | F64   | 2.859 | F28   | C184  | 3.120 |
| F13   | C173  | 3.141 | F179  | C177  | 3.152 |

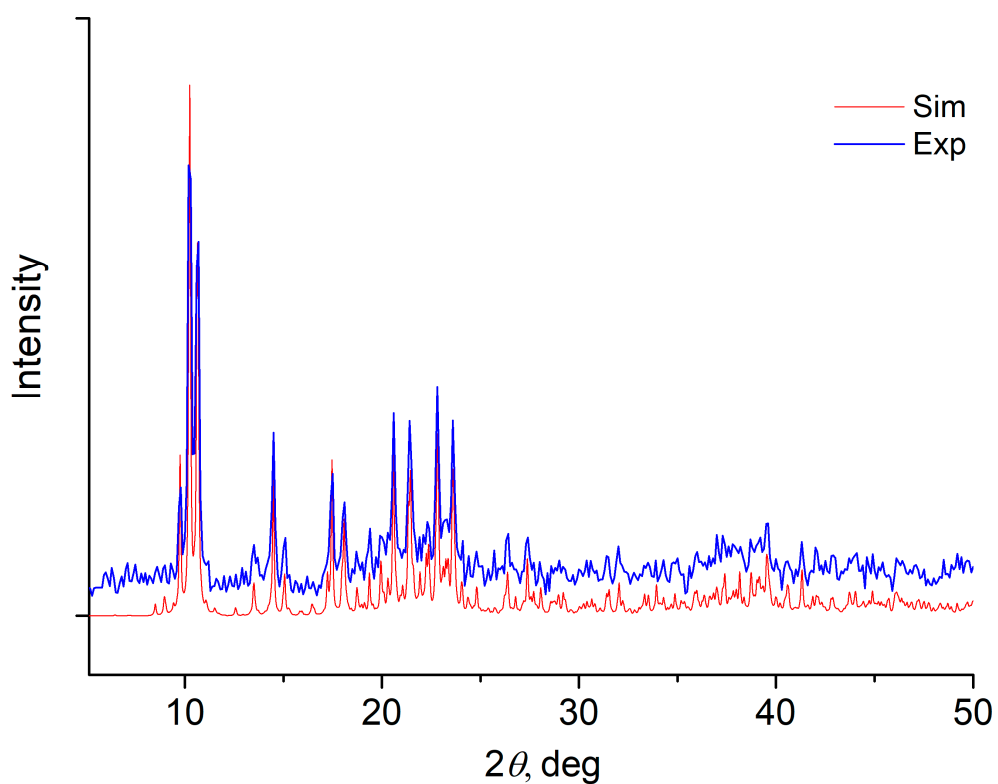

**Figure S1.** Experimental (blue) and simulated from single-crystal data (red) powder X-ray diffraction pattern of polycrystalline sample of **5**.

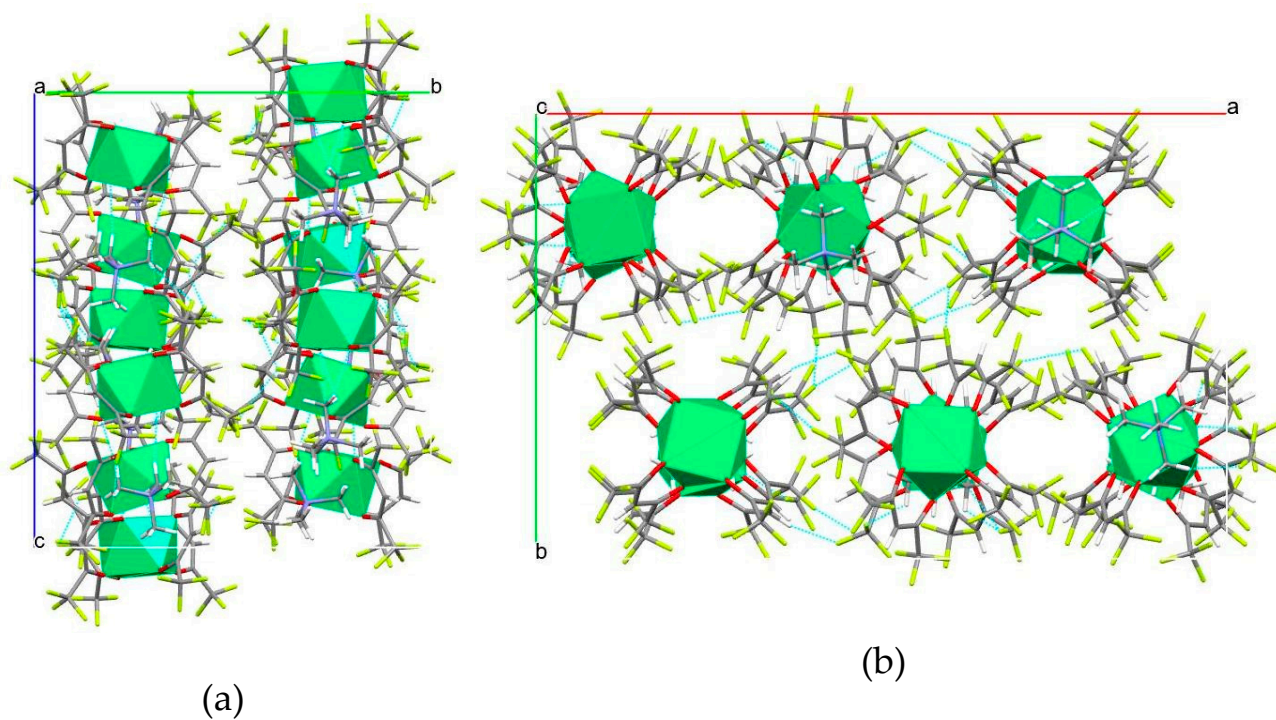

**Figure S2.** Projections of the fragments of the crystal structure of **5** on *bc* and *ab* crystallographic planes. Dashed cyan lines show shortest intermolecular contacts.

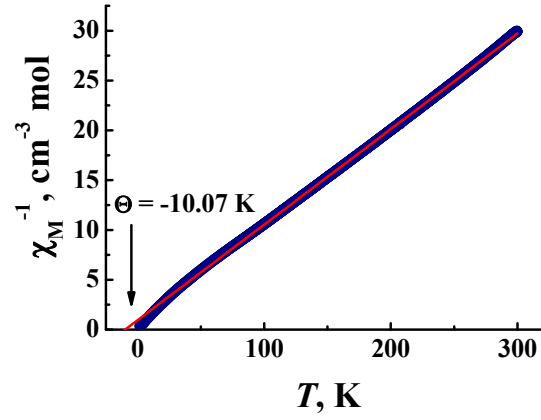

**Figure. S3.** Plot of the  $1/\chi_M$  vs  $T$ . The red solid line represents the extrapolation of the high-temperature data to  $1/\chi_M = 0$ . The arrow marks the Weiss temperature.

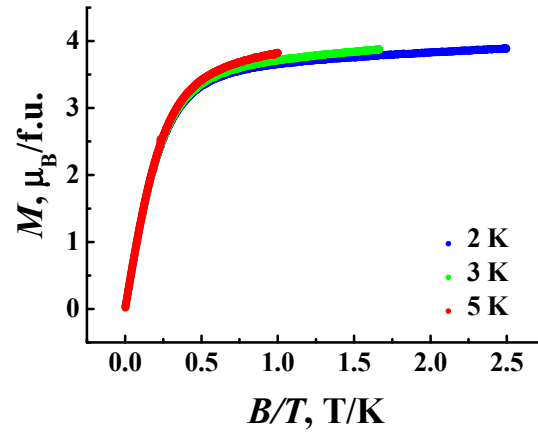

**Figure S4.**  $M$  vs  $BT^{-1}$  plots at 2, 3 and 5 K.

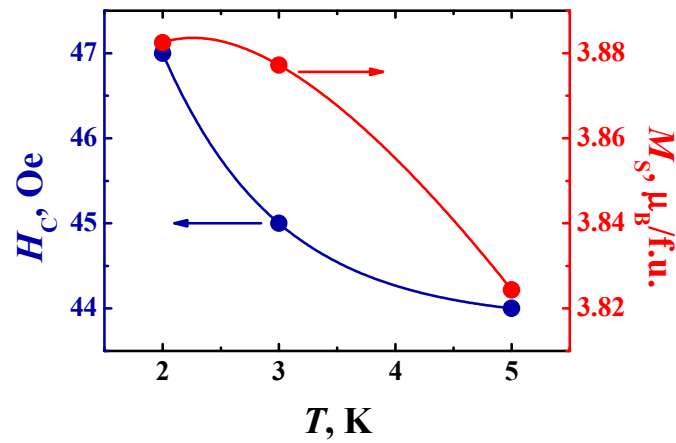

**Figure S5.** Temperature dependences of the saturation magnetization and coercive field. The solid lines show the splines.

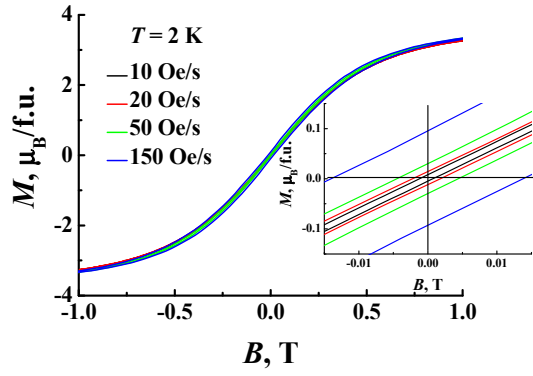

(a)

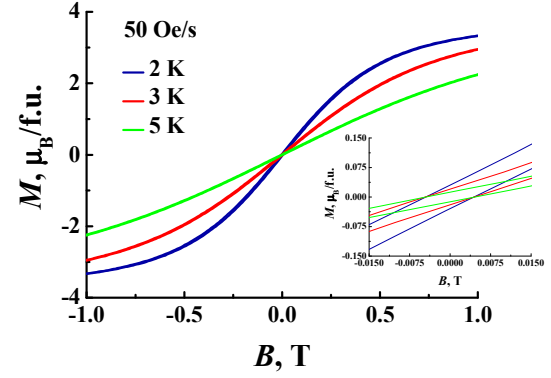

(b)

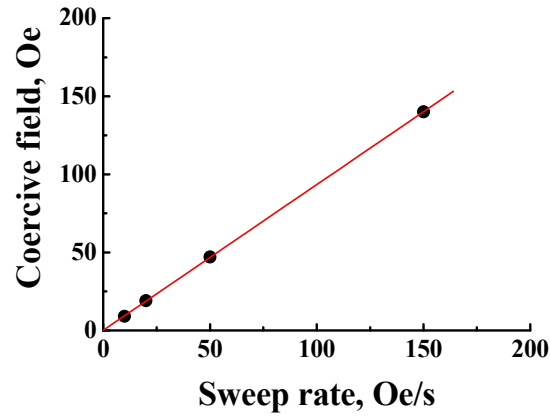

c)

**Figure S6.** Hysteresis loops at different magnetic field sweep rates (a) and temperatures (b). The inset shows low-field fragments of loops. c) Dependence of the coercive field on the magnetic field sweep rate at a temperature of 2 K.

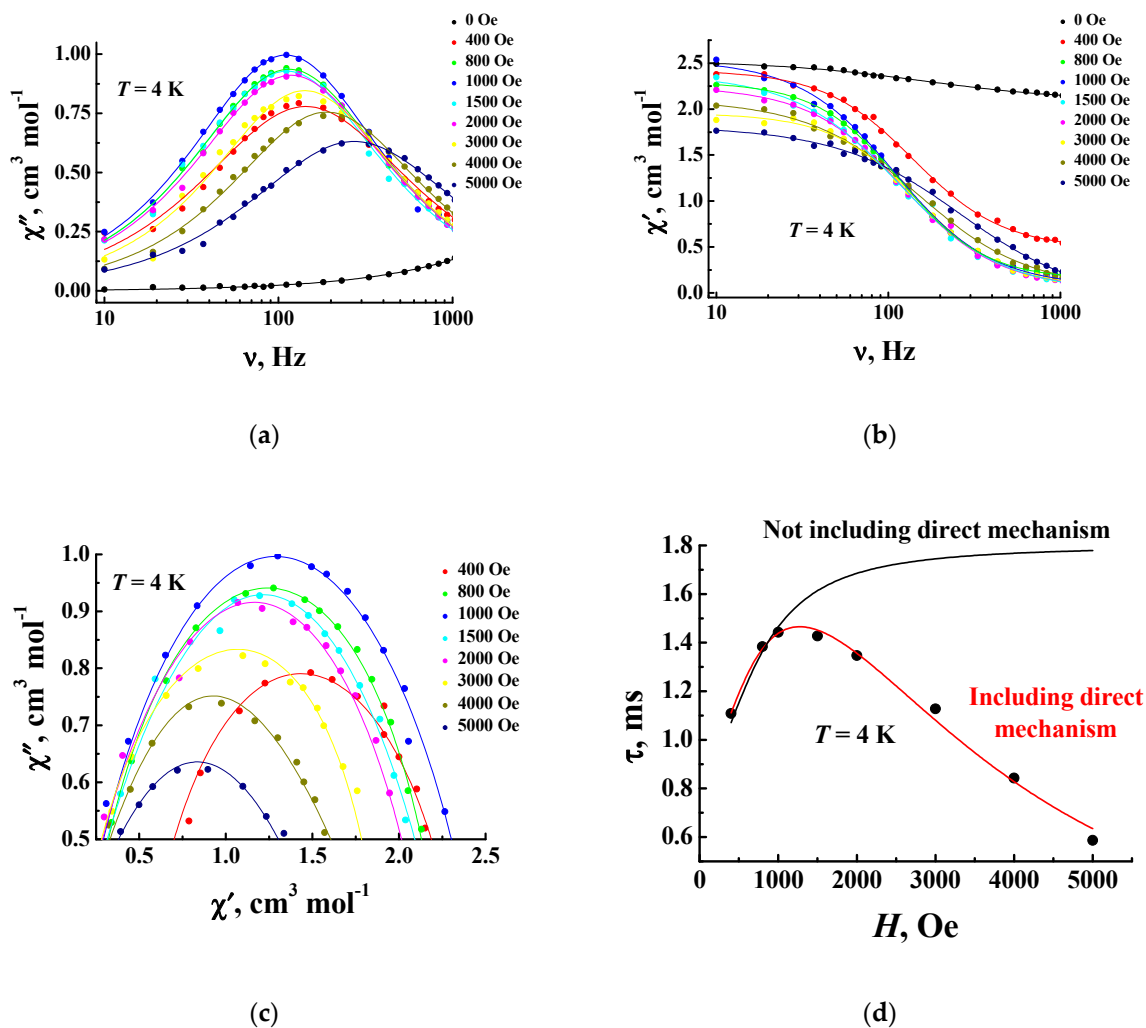

**Figure S7.** Frequency dependences of the in-phase (a) and out-of-phase (b) ac susceptibility; (c) Cole-Cole plots for complex 5 at 4 K and indicated dc fields; (d) field dependence of the relaxation time  $\tau$  at 4 K. Symbols are experimental data, solid lines indicate fits.

**Table S4.** Fit parameters for 5 at 4 K and indicated dc fields ( $R^2 = 0.99913$ ).

| $H$ , Oe | $\chi_s$ ,<br>cm <sup>3</sup> mol <sup>-1</sup> | $\Delta\chi\tau$ ,<br>cm <sup>3</sup> mol <sup>-1</sup> | $\tau$ , s            | $\alpha$ |
|----------|-------------------------------------------------|---------------------------------------------------------|-----------------------|----------|
| 400      | 0.470                                           | 1.861                                                   | $1.108 \cdot 10^{-3}$ | 0.103    |
| 800      | 0.135                                           | 2.102                                                   | $1.383 \cdot 10^{-3}$ | 0.071    |
| 1000     | 0.052                                           | 2.248                                                   | $1.442 \cdot 10^{-3}$ | 0.076    |
| 1500     | 0.044                                           | 2.074                                                   | $1.426 \cdot 10^{-3}$ | 0.070    |
| 2000     | 0.029                                           | 2.048                                                   | $1.347 \cdot 10^{-3}$ | 0.071    |
| 3000     | 0.054                                           | 1.898                                                   | $1.127 \cdot 10^{-3}$ | 0.082    |
| 4000     | 0.019                                           | 1.711                                                   | $0.842 \cdot 10^{-3}$ | 0.082    |
| 5000     | 0.010                                           | 1.533                                                   | $0.585 \cdot 10^{-3}$ | 0.118    |

**Table S5.** Fit parameters for **5** at 1000 Oe dc fields and indicated temperatures ( $R^2 = 0.99968$ ).

| $T, \text{K}$ | $\chi^s,$<br>$\text{cm}^3 \text{mol}^{-1}$ | $\Delta\chi^s,$<br>$\text{cm}^3 \text{mol}^{-1}$ | $\tau, \text{s}$      | $\alpha$ |
|---------------|--------------------------------------------|--------------------------------------------------|-----------------------|----------|
| 3             | 0.091                                      | 2.688                                            | $8.624 \cdot 10^{-3}$ | 0.119    |
| 3.5           | 0.078                                      | 2.251                                            | $3.073 \cdot 10^{-3}$ | 0.064    |
| 4             | 0.052                                      | 2.248                                            | $1.442 \cdot 10^{-3}$ | 0.076    |
| 4.5           | 0.090                                      | 1.738                                            | $0.724 \cdot 10^{-3}$ | 0.075    |
| 5             | 0.062                                      | 1.518                                            | $0.415 \cdot 10^{-3}$ | 0.089    |
| 5.5           | 0.037                                      | 1.365                                            | $0.257 \cdot 10^{-3}$ | 0.068    |
| 6             | 0.036                                      | 1.225                                            | $0.171 \cdot 10^{-3}$ | 0.067    |
| 6.5           | 0.034                                      | 1.135                                            | $0.116 \cdot 10^{-3}$ | 0.074    |
| 7             | 0.035                                      | 1.063                                            | $0.085 \cdot 10^{-3}$ | 0.069    |
| 7.5           | 0.032                                      | 0.981                                            | $0.065 \cdot 10^{-3}$ | 0.074    |
| 8             | 0.030                                      | 0.914                                            | $0.047 \cdot 10^{-3}$ | 0.088    |
| 8.5           | 0.028                                      | 0.816                                            | $0.041 \cdot 10^{-3}$ | 0.067    |
| 9             | 0.027                                      | 0.763                                            | $0.031 \cdot 10^{-3}$ | 0.076    |
| 9.5           | 0.024                                      | 0.676                                            | $0.028 \cdot 10^{-3}$ | 0.059    |
| 10            | 0.023                                      | 0.681                                            | $0.020 \cdot 10^{-3}$ | 0.083    |
